# Supplementary material for: Does the EU Taxonomy Regulation Nudge Investors? Evidence from STOXX Europe 600 Firms
Source: Research Square preprint supplement (doi:10.21203/rs.3.rs-7931061/v1), 2025-11-20
Supplement: Supplementary file 1 [file 6e8fd28cd1c5161fc9569e32.docx]

### **5.2. Robustness tests**

**5.2.1. Alternative funds classification (Articles 8 & 9 vs. Article 6)**

Table 1 presents the relationship between KPI disclosure and ownership for sustainable and nonsustainable funds. The dependent variable is based on the SFDR classification, in which context Articles 8 and 9 represent sustainable funds and Article 6 represents nonsustainable funds. Definitions of the independent variables are provided in the paper. *, **, and *** denote significance at the 10%, 5%, and 1% levels, respectively. Robust standard errors are applied, and t statistics are shown in parentheses.

**Table 1. Relationship between KPI disclosure and fund ownership (based on the SFDR classification)**

|  | (1) | (2) |
| --- | --- | --- |
| Variable | % shares Art 8,9 (SFDR) | % shares Art 6 (SFDR) |
|  |  |  |
| KPI Disclosure | 5.073*** | -11.33*** |
|  | (0.431) | (0.589) |
| Size | -1.560*** | -1.403*** |
|  | (0.181) | (0.219) |
| ROA | 3.215 | 0.0334 |
|  | (2.692) | (3.534) |
| Leverage | -0.434** | -0.0161 |
|  | (0.213) | (0.321) |
| Number of Analysts | -0.0725** | 0.338*** |
|  | (0.0357) | (0.0407) |
| Constant | 31.97*** | 39.71*** |
|  | (2.825) | (3.606) |
| Year Fixed Effects | Yes | Yes |
| Industry Fixed Effects | Yes | Yes |
| Observations | 966 | 966 |
| R-squared | 0.247 | 0.412 |

Table 2 presents the relationship between KPI levels and sustainable fund ownership. The dependent variable is based on the SFDR classification, in which context Articles 8 and 9 represent sustainable funds. Definitions of the independent variables are provided in the paper. *, **, and *** denote significance at the 10%, 5%, and 1% levels, respectively. Robust standard errors are applied, and t statistics are shown in parentheses.

**Table 2. Relationship between KPI levels and OEF fund ownership – Articles 8 & 9 Classification (SFDR)**

|  | (1) | (2) | (3) | (4) | (5) | (6) |
| --- | --- | --- | --- | --- | --- | --- |
| Variable | % shares Art 8,9 (SFDR) | % shares Art 8,9 (SFDR) | % shares Art 8,9 (SFDR) | % shares Art 8,9 (SFDR) | % shares Art 8,9 (SFDR) | % shares Art 8,9 (SFDR) |
|  |  |  |  |  |  |  |
| TO eli | 4.281*** |  |  |  |  |  |
|  | (0.842) |  |  |  |  |  |
| TO ali |  | 7.730*** |  |  |  |  |
|  |  | (2.821) |  |  |  |  |
| OPEX eli |  |  | 3.212*** |  |  |  |
|  |  |  | (0.854) |  |  |  |
| OPEX ali |  |  |  | 7.432*** |  |  |
|  |  |  |  | (2.644) |  |  |
| CAPEX eli |  |  |  |  | 4.548*** |  |
|  |  |  |  |  | (0.729) |  |
| CAPEX ali |  |  |  |  |  | 5.131** |
|  |  |  |  |  |  | (2.394) |
| Size | -1.442*** | -1.222*** | -1.364*** | -1.285*** | -1.506*** | -1.306*** |
|  | (0.187) | (0.256) | (0.190) | (0.258) | (0.187) | (0.266) |
| ROA | 2.143 | 1.300 | 1.858 | 0.660 | 2.274 | 0.674 |
|  | (2.833) | (3.817) | (2.855) | (3.775) | (2.778) | (3.853) |
| Leverage | -0.610*** | -0.549* | -0.527** | -0.493 | -0.502** | -0.520 |
|  | (0.231) | (0.312) | (0.226) | (0.321) | (0.230) | (0.316) |
| Number of Analysts | -0.0645* | -0.0923* | -0.0778** | -0.0911* | -0.0652* | -0.0854 |
|  | (0.0375) | (0.0559) | (0.0380) | (0.0552) | (0.0372) | (0.0556) |
| Constant | 33.35*** | 30.34*** | 32.61*** | 31.33*** | 34.18*** | 31.54*** |
|  | (2.963) | (4.074) | (3.001) | (4.097) | (2.964) | (4.174) |
| Year Fixed Effects | Yes | Yes | Yes | Yes | Yes | Yes |
| Industry Fixed Effects | Yes | Yes | Yes | Yes | Yes | Yes |
| Observations | 966 | 484 | 966 | 484 | 966 | 484 |
| R-squared | 0.167 | 0.161 | 0.156 | 0.161 | 0.176 | 0.152 |

Table 3 reports the relationship between KPI disclosure and ownership by nonsustainable funds. The dependent variable is based on the SFDR classification, in which context Article 6 represents nonsustainable funds. Definitions of the independent variables are provided in the paper. *, **, and *** denote significance at the 10%, 5%, and 1% levels, respectively. Robust standard errors are applied, and t statistics are shown in parentheses.

**Table 3. Relationship between KPI levels and OEF fund ownership – Article 6 Classification (SFDR)**

|  | (1) | (2) | (3) | (4) | (5) | (6) |
| --- | --- | --- | --- | --- | --- | --- |
| Variable | % shares Art 6 (SFDR) | % shares Art 6 (SFDR) | % shares Art 6 (SFDR) | % shares Art 6 (SFDR) | % shares Art 6 (SFDR) | % shares Art 6 (SFDR) |
|  |  |  |  |  |  |  |
| TO eli | -10.19*** |  |  |  |  |  |
|  | (0.801) |  |  |  |  |  |
| TO ali |  | -13.91*** |  |  |  |  |
|  |  | (2.565) |  |  |  |  |
| OPEX eli |  |  | -8.260*** |  |  |  |
|  |  |  | (0.777) |  |  |  |
| OPEX ali |  |  |  | -13.90*** |  |  |
|  |  |  |  | (2.529) |  |  |
| CAPEX eli |  |  |  |  | -11.30*** |  |
|  |  |  |  |  | (0.777) |  |
| CAPEX ali |  |  |  |  |  | -13.95*** |
|  |  |  |  |  |  | (1.932) |
| Size | -1.635*** | -2.024*** | -1.795*** | -1.907*** | -1.456*** | -1.812*** |
|  | (0.270) | (0.413) | (0.277) | (0.409) | (0.263) | (0.407) |
| ROA | 2.370 | 3.218 | 3.032 | 4.372 | 2.008 | 4.355 |
|  | (3.748) | (5.749) | (3.797) | (5.704) | (3.758) | (5.734) |
| Leverage | 0.384 | 0.167 | 0.178 | 0.0604 | 0.120 | 0.0701 |
|  | (0.357) | (0.501) | (0.369) | (0.499) | (0.361) | (0.498) |
| Number of Analysts | 0.318*** | 0.345*** | 0.349*** | 0.343*** | 0.318*** | 0.329*** |
|  | (0.0494) | (0.0803) | (0.0501) | (0.0805) | (0.0480) | (0.0805) |
| Constant | 36.26*** | 41.90*** | 37.69*** | 40.08*** | 33.94*** | 39.12*** |
|  | (4.229) | (6.532) | (4.325) | (6.450) | (4.141) | (6.417) |
| Year Fixed Effects | Yes | Yes | Yes | Yes | Yes | Yes |
| Industry Fixed Effects | Yes | Yes | Yes | Yes | Yes | Yes |
| Observations | 966 | 484 | 966 | 484 | 966 | 484 |
| R-squared | 0.197 | 0.148 | 0.171 | 0.153 | 0.236 | 0.165 |

**5.2.2. Alternative measure of fund ownership**

Table 4 reports the relationship between KPI disclosure and ownership for sustainable and nonsustainable funds. We use alternative dependent variables, measured as the natural logarithm of the fund value held by funds assigned to each category—(i) the Morningstar Sustainability Rating (1 to 5 globes) and (ii) the Sustainable Investment Overall indicator (Yes/No) from the Morningstar database. Definitions of the independent variables are provided in the paper. *, **, and *** denote significance at the 10%, 5%, and 1% levels, respectively. Robust standard errors are applied, and t statistics are shown in parentheses.

**Table 4. Relationship between KPI disclosure and fund ownership**

|  | (1) | (2) | (3) | (4) | (5) | (6) | (7) |
| --- | --- | --- | --- | --- | --- | --- | --- |
| Variable | Ln fund value held MSR (1-G) | Ln fund value held MSR (2-G) | Ln fund value held MSR (3-G) | Ln fund value held MSR (4-G) | Ln fund value held MSR (5-G) | Ln fund value held SIO (Yes) | Ln fund value held SIO (No) |
|  |  |  |  |  |  |  |  |
| KPI Disclosure | -0.731*** | -0.591*** | -0.231*** | -0.109 | 0.248** | 0.0235 | -0.371*** |
|  | (0.0884) | (0.0629) | (0.0620) | (0.0708) | (0.102) | (0.0802) | (0.0565) |
| Size | 0.820*** | 0.470*** | 0.388*** | 0.288*** | 0.206*** | 0.308*** | 0.414*** |
|  | (0.0470) | (0.0408) | (0.0356) | (0.0356) | (0.0488) | (0.0380) | (0.0342) |
| ROA | 3.179*** | 4.476*** | 4.187*** | 4.301*** | 6.550*** | 4.307*** | 4.337*** |
|  | (0.676) | (0.512) | (0.529) | (0.590) | (0.821) | (0.605) | (0.488) |
| Leverage | -0.111** | -0.0746** | -0.115*** | -0.127** | -0.0623 | -0.162*** | -0.0845** |
|  | (0.0513) | (0.0352) | (0.0377) | (0.0551) | (0.0690) | (0.0581) | (0.0353) |
| Number of Analysts | 0.0180** | 0.0560*** | 0.0594*** | 0.0821*** | 0.102*** | 0.0752*** | 0.0612*** |
|  | (0.00891) | (0.00731) | (0.00627) | (0.00629) | (0.00901) | (0.00663) | (0.00585) |
| Constant | 4.489*** | 11.50*** | 12.66*** | 12.98*** | 12.66*** | 12.72*** | 13.21*** |
|  | (0.720) | (0.591) | (0.534) | (0.558) | (0.748) | (0.578) | (0.514) |
| Year Fixed Effects | Yes | Yes | Yes | Yes | Yes | Yes | Yes |
| Industry Fixed Effects | Yes | Yes | Yes | Yes | Yes | Yes | Yes |
| Observations | 962 | 964 | 965 | 965 | 964 | 964 | 965 |
| R-squared | 0.474 | 0.523 | 0.460 | 0.427 | 0.311 | 0.382 | 0.525 |

Table 5 reports the relationship between KPI disclosure and ownership by funds classified as 1-globe in the Morningstar Sustainability Rating. The dependent variable corresponds to the natural logarithm of the fund value held by funds classified as 1-globe in the Morningstar Sustainability Rating. Definitions of the independent variables are provided in the paper. *, **, and *** denote significance at the 10%, 5%, and 1% levels, respectively. Robust standard errors are applied, and t statistics are shown in parentheses.

**Table 5. Relationship between KPI levels and OEF fund ownership – MSR (1-G)**

|  | (1) | (2) | (3) | (4) | (5) | (6) |
| --- | --- | --- | --- | --- | --- | --- |
| Variable | Ln fund value held MSR (1-G) | Ln fund value held MSR (1-G) | Ln fund value held MSR (1-G) | Ln fund value held MSR (1-G) | Ln fund value held MSR (1-G) | Ln fund value held MSR (1-G) |
|  |  |  |  |  |  |  |
| TO eli | -0.836*** |  |  |  |  |  |
|  | (0.160) |  |  |  |  |  |
| TO ali |  | -1.608*** |  |  |  |  |
|  |  | (0.376) |  |  |  |  |
| OPEX eli |  |  | -0.726*** |  |  |  |
|  |  |  | (0.167) |  |  |  |
| OPEX ali |  |  |  | -1.968*** |  |  |
|  |  |  |  | (0.368) |  |  |
| CAPEX eli |  |  |  |  | -0.918*** |  |
|  |  |  |  |  | (0.149) |  |
| CAPEX ali |  |  |  |  |  | -2.038*** |
|  |  |  |  |  |  | (0.331) |
| Size | 0.814*** | 0.794*** | 0.802*** | 0.808*** | 0.828*** | 0.824*** |
|  | (0.0499) | (0.0689) | (0.0495) | (0.0685) | (0.0491) | (0.0686) |
| ROA | 3.336*** | 3.447*** | 3.391*** | 3.585*** | 3.303*** | 3.577*** |
|  | (0.672) | (0.931) | (0.667) | (0.925) | (0.679) | (0.932) |
| Leverage | -0.0822 | -0.0709 | -0.0996* | -0.0872 | -0.104* | -0.0863 |
|  | (0.0539) | (0.0706) | (0.0546) | (0.0698) | (0.0538) | (0.0695) |
| Number of Analysts | 0.0161* | 0.0167 | 0.0187** | 0.0168 | 0.0161* | 0.0145 |
|  | (0.00936) | (0.0139) | (0.00929) | (0.0139) | (0.00921) | (0.0140) |
| Constant | 4.166*** | 4.597*** | 4.264*** | 4.386*** | 3.983*** | 4.222*** |
|  | (0.754) | (1.050) | (0.749) | (1.039) | (0.744) | (1.037) |
| Year Fixed Effects | Yes | Yes | Yes | Yes | Yes | Yes |
| Industry Fixed Effects | Yes | Yes | Yes | Yes | Yes | Yes |
| Observations | 962 | 481 | 962 | 481 | 962 | 481 |
| R-squared | 0.455 | 0.446 | 0.452 | 0.456 | 0.462 | 0.465 |

Table 6 reports the relationship between KPI disclosure and ownership by funds classified as 2-globes in the Morningstar Sustainability Rating. The dependent variable corresponds to the natural logarithm of the fund value held by funds classified as 2-globes in the Morningstar Sustainability Rating. Definitions of the independent variables are provided in the paper. *, **, and *** denote significance at the 10%, 5%, and 1% levels, respectively. Robust standard errors are applied, and t statistics are shown in parentheses.

**Table 6. Relationship between KPI levels and OEF fund ownership – MSR (2-G)**

|  | (1) | (2) | (3) | (4) | (5) | (6) |
| --- | --- | --- | --- | --- | --- | --- |
| Variable | Ln fund value held MSR (2-G) | Ln fund value held MSR (2-G) | Ln fund value held MSR (2-G) | Ln fund value held MSR (2-G) | Ln fund value held MSR (2-G) | Ln fund value held MSR (2-G) |
|  |  |  |  |  |  |  |
| TO eli | -0.699*** |  |  |  |  |  |
|  | (0.109) |  |  |  |  |  |
| TO ali |  | -0.945*** |  |  |  |  |
|  |  | (0.271) |  |  |  |  |
| OPEX eli |  |  | -0.634*** |  |  |  |
|  |  |  | (0.114) |  |  |  |
| OPEX ali |  |  |  | -1.107*** |  |  |
|  |  |  |  | (0.305) |  |  |
| CAPEX eli |  |  |  |  | -0.774*** |  |
|  |  |  |  |  | (0.0970) |  |
| CAPEX ali |  |  |  |  |  | -1.107*** |
|  |  |  |  |  |  | (0.210) |
| Size | 0.466*** | 0.420*** | 0.457*** | 0.429*** | 0.478*** | 0.437*** |
|  | (0.0437) | (0.0665) | (0.0424) | (0.0655) | (0.0430) | (0.0665) |
| ROA | 4.591*** | 4.821*** | 4.635*** | 4.900*** | 4.565*** | 4.899*** |
|  | (0.502) | (0.800) | (0.499) | (0.802) | (0.510) | (0.809) |
| Leverage | -0.0515 | -0.0353 | -0.0663* | -0.0442 | -0.0697** | -0.0434 |
|  | (0.0350) | (0.0492) | (0.0364) | (0.0487) | (0.0353) | (0.0487) |
| Number of Analysts | 0.0545*** | 0.0605*** | 0.0566*** | 0.0604*** | 0.0544*** | 0.0593*** |
|  | (0.00775) | (0.0122) | (0.00764) | (0.0122) | (0.00760) | (0.0122) |
| Constant | 11.23*** | 11.87*** | 11.29*** | 11.73*** | 11.07*** | 11.66*** |
|  | (0.621) | (0.953) | (0.608) | (0.940) | (0.614) | (0.952) |
| Year Fixed Effects | Yes | Yes | Yes | Yes | Yes | Yes |
| Industry Fixed Effects | Yes | Yes | Yes | Yes | Yes | Yes |
| Observations | 964 | 483 | 964 | 483 | 964 | 483 |
| R-squared | 0.500 | 0.444 | 0.497 | 0.449 | 0.510 | 0.452 |

Table 7 reports the relationship between KPI disclosure and ownership by funds classified as 3-globes in the Morningstar Sustainability Rating. The dependent variable corresponds to the natural logarithm of the fund value held by funds classified as 3-globes in the Morningstar Sustainability Rating. Definitions of the independent variables are provided in the paper. *, **, and *** denote significance at the 10%, 5%, and 1% levels, respectively. Robust standard errors are applied, and t statistics are shown in parentheses.

**Table 7. Relationship between KPI levels and OEF fund ownership – MSR (3-G)**

|  | (1) | (2) | (3) | (4) | (5) | (6) |
| --- | --- | --- | --- | --- | --- | --- |
| Variable | Ln fund value held MSR (3-G) | Ln fund value held MSR (3-G) | Ln fund value held MSR (3-G) | Ln fund value held MSR (3-G) | Ln fund value held MSR (3-G) | Ln fund value held MSR (3-G) |
|  |  |  |  |  |  |  |
| TO eli | -0.411*** |  |  |  |  |  |
|  | (0.111) |  |  |  |  |  |
| TO ali |  | -0.318 |  |  |  |  |
|  |  | (0.310) |  |  |  |  |
| OPEX eli |  |  | -0.339*** |  |  |  |
|  |  |  | (0.118) |  |  |  |
| OPEX ali |  |  |  | -0.442 |  |  |
|  |  |  |  | (0.330) |  |  |
| CAPEX eli |  |  |  |  | -0.445*** |  |
|  |  |  |  |  | (0.0988) |  |
| CAPEX ali |  |  |  |  |  | -0.529** |
|  |  |  |  |  |  | (0.252) |
| Size | 0.393*** | 0.375*** | 0.386*** | 0.378*** | 0.399*** | 0.382*** |
|  | (0.0365) | (0.0546) | (0.0356) | (0.0541) | (0.0364) | (0.0548) |
| ROA | 4.219*** | 4.334*** | 4.246*** | 4.361*** | 4.204*** | 4.361*** |
|  | (0.518) | (0.788) | (0.517) | (0.792) | (0.523) | (0.797) |
| Leverage | -0.105*** | -0.0960* | -0.113*** | -0.0998* | -0.115*** | -0.100** |
|  | (0.0375) | (0.0511) | (0.0379) | (0.0509) | (0.0378) | (0.0510) |
| Number of Analysts | 0.0582*** | 0.0673*** | 0.0595*** | 0.0673*** | 0.0582*** | 0.0668*** |
|  | (0.00641) | (0.00999) | (0.00633) | (0.01000) | (0.00636) | (0.00999) |
| Constant | 12.47*** | 12.59*** | 12.52*** | 12.54*** | 12.38*** | 12.50*** |
|  | (0.541) | (0.817) | (0.534) | (0.811) | (0.541) | (0.819) |
| Year Fixed Effects | Yes | Yes | Yes | Yes | Yes | Yes |
| Industry Fixed Effect | Yes | Yes | Yes | Yes | Yes | Yes |
| Observations | 965 | 484 | 965 | 484 | 965 | 484 |
| R-squared | 0.460 | 0.439 | 0.458 | 0.440 | 0.464 | 0.442 |

Table 8 reports the relationship between KPI disclosure and ownership by funds classified as 4-globes in the Morningstar Sustainability Rating. The dependent variable corresponds to the natural logarithm of the fund value held by funds classified as 4-globes in the Morningstar Sustainability Rating. Definitions of the independent variables are provided in the paper. *, **, and *** denote significance at the 10%, 5%, and 1% levels, respectively. Robust standard errors are applied, and t statistics are shown in parentheses.

**Table 8. Relationship between KPI levels and OEF fund ownership – MSR (4-G)**

|  | (1) | (2) | (3) | (4) | (5) | (6) |
| --- | --- | --- | --- | --- | --- | --- |
| Variable | Ln fund value held MSR (4-G) | Ln fund value held MSR (4-G) | Ln fund value held MSR (4-G) | Ln fund value held MSR (4-G) | Ln fund value held MSR (4-G) | Ln fund value held MSR (4-G) |
|  |  |  |  |  |  |  |
| TO eli | -0.302** |  |  |  |  |  |
|  | (0.136) |  |  |  |  |  |
| TO ali |  | 0.362 |  |  |  |  |
|  |  | (0.336) |  |  |  |  |
| OPEX eli |  |  | -0.266* |  |  |  |
|  |  |  | (0.136) |  |  |  |
| OPEX ali |  |  |  | -0.0116 |  |  |
|  |  |  |  | (0.374) |  |  |
| CAPEX eli |  |  |  |  | -0.289** |  |
|  |  |  |  |  | (0.115) |  |
| CAPEX ali |  |  |  |  |  | 0.0120 |
|  |  |  |  |  |  | (0.305) |
| Size | 0.295*** | 0.245*** | 0.291*** | 0.245*** | 0.298*** | 0.244*** |
|  | (0.0357) | (0.0547) | (0.0350) | (0.0543) | (0.0359) | (0.0549) |
| ROA | 4.306*** | 4.621*** | 4.325*** | 4.592*** | 4.300*** | 4.592*** |
|  | (0.583) | (0.813) | (0.581) | (0.821) | (0.587) | (0.820) |
| Leverage | -0.121** | -0.0835 | -0.128** | -0.0845 | -0.129** | -0.0843 |
|  | (0.0553) | (0.0741) | (0.0555) | (0.0746) | (0.0554) | (0.0744) |
| Number of Analysts | 0.0812*** | 0.0934*** | 0.0821*** | 0.0936*** | 0.0813*** | 0.0936*** |
|  | (0.00636) | (0.00964) | (0.00632) | (0.00968) | (0.00633) | (0.00970) |
| Constant | 12.83*** | 13.36*** | 12.86*** | 13.38*** | 12.79*** | 13.38*** |
|  | (0.554) | (0.846) | (0.548) | (0.841) | (0.558) | (0.847) |
| Year Fixed Effects | Yes | Yes | Yes | Yes | Yes | Yes |
| Industry Fixed Effects | Yes | Yes | Yes | Yes | Yes | Yes |
| Observations | 965 | 484 | 965 | 484 | 965 | 484 |
| R-squared | 0.429 | 0.439 | 0.429 | 0.438 | 0.430 | 0.438 |

Table 9 reports the relationship between KPI disclosure and ownership by funds classified as 5-globes in the Morningstar Sustainability Rating. The dependent variable corresponds to the natural logarithm of the fund value held by funds classified as 5-globes in the Morningstar Sustainability Rating. Definitions of the independent variables are provided in the paper. *, **, and *** denote significance at the 10%, 5%, and 1% levels, respectively. Robust standard errors are applied, and t statistics are shown in parentheses.

**Table 9. Relationship between KPI levels and OEF fund ownership – MSR (5-G)**

|  | (1) | (2) | (3) | (4) | (5) | (6) |
| --- | --- | --- | --- | --- | --- | --- |
| Variable | Ln fund value held MSR (5-G) | Ln fund value held MSR (5-G) | Ln fund value held MSR (5-G) | Ln fund value held MSR (5-G) | Ln fund value held MSR (5-G) | Ln fund value held MSR (5-G) |
|  |  |  |  |  |  |  |
| TO eli | 0.206 |  |  |  |  |  |
|  | (0.180) |  |  |  |  |  |
| TO ali |  | 1.698*** |  |  |  |  |
|  |  | (0.438) |  |  |  |  |
| OPEX eli |  |  | 0.0536 |  |  |  |
|  |  |  | (0.184) |  |  |  |
| OPEX ali |  |  |  | 1.005** |  |  |
|  |  |  |  | (0.510) |  |  |
| CAPEX eli |  |  |  |  | 0.290* |  |
|  |  |  |  |  | (0.156) |  |
| CAPEX ali |  |  |  |  |  | 1.159*** |
|  |  |  |  |  |  | (0.402) |
| Size | 0.212*** | 0.195** | 0.220*** | 0.185** | 0.205*** | 0.176** |
|  | (0.0494) | (0.0792) | (0.0479) | (0.0792) | (0.0497) | (0.0793) |
| ROA | 6.495*** | 7.205*** | 6.477*** | 7.065*** | 6.510*** | 7.067*** |
|  | (0.826) | (1.142) | (0.823) | (1.155) | (0.823) | (1.145) |
| Leverage | -0.0703 | -0.0307 | -0.0672 | -0.0232 | -0.0642 | -0.0241 |
|  | (0.0684) | (0.0818) | (0.0684) | (0.0840) | (0.0684) | (0.0828) |
| Number of Analysts | 0.102*** | 0.115*** | 0.101*** | 0.115*** | 0.102*** | 0.116*** |
|  | (0.00915) | (0.0144) | (0.00905) | (0.0146) | (0.00911) | (0.0145) |
| Constant | 12.72*** | 12.67*** | 12.63*** | 12.85*** | 12.82*** | 12.93*** |
|  | (0.754) | (1.197) | (0.739) | (1.200) | (0.759) | (1.198) |
| Year Fixed Effects | Yes | Yes | Yes | Yes | Yes | Yes |
| Industry Fixed Effects | Yes | Yes | Yes | Yes | Yes | Yes |
| Observations | 964 | 483 | 964 | 483 | 964 | 483 |
| R-squared | 0.307 | 0.331 | 0.307 | 0.321 | 0.309 | 0.326 |

Table 10 reports the relationship between KPI disclosure and ownership by funds classified as sustainable by the Sustainable Investment Overall (Yes). The dependent variable corresponds to the natural logarithm of the fund value held by funds classified as sustainable by the Sustainable Investment Overall (Yes). Definitions of the independent variables are provided in the paper. *, **, and *** denote significance at the 10%, 5%, and 1% levels, respectively. Robust standard errors are applied, and t statistics are shown in parentheses.

**Table 10. Relationship between KPI levels and OEF fund ownership – SIO (Yes)**

|  | (1) | (2) | (3) | (4) | (5) | (6) |
| --- | --- | --- | --- | --- | --- | --- |
| Variable | Ln fund value held SIO (Yes) | Ln fund value held SIO (Yes) | Ln fund value held SIO (Yes) | Ln fund value held SIO (Yes) | Ln fund value held SIO (Yes) | Ln fund value held SIO (Yes) |
|  |  |  |  |  |  |  |
| TO eli | 0.131 |  |  |  |  |  |
|  | (0.149) |  |  |  |  |  |
| TO ali |  | 1.197*** |  |  |  |  |
|  |  | (0.334) |  |  |  |  |
| OPEX eli |  |  | 0.0334 |  |  |  |
|  |  |  | (0.151) |  |  |  |
| OPEX ali |  |  |  | 0.567 |  |  |
|  |  |  |  | (0.394) |  |  |
| CAPEX eli |  |  |  |  | 0.117 |  |
|  |  |  |  |  | (0.129) |  |
| CAPEX ali |  |  |  |  |  | 0.608* |
|  |  |  |  |  |  | (0.331) |
| Size | 0.303*** | 0.304*** | 0.308*** | 0.298*** | 0.303*** | 0.293*** |
|  | (0.0384) | (0.0592) | (0.0377) | (0.0592) | (0.0387) | (0.0595) |
| ROA | 4.312*** | 4.990*** | 4.300*** | 4.893*** | 4.313*** | 4.893*** |
|  | (0.604) | (0.862) | (0.602) | (0.875) | (0.602) | (0.870) |
| Leverage | -0.164*** | -0.105 | -0.163*** | -0.102 | -0.161*** | -0.102 |
|  | (0.0580) | (0.0693) | (0.0579) | (0.0708) | (0.0580) | (0.0702) |
| Number of Analysts | 0.0757*** | 0.0802*** | 0.0752*** | 0.0805*** | 0.0756*** | 0.0811*** |
|  | (0.00667) | (0.0103) | (0.00662) | (0.0104) | (0.00666) | (0.0104) |
| Constant | 12.79*** | 12.71*** | 12.73*** | 12.83*** | 12.80*** | 12.87*** |
|  | (0.583) | (0.892) | (0.576) | (0.892) | (0.587) | (0.894) |
| Year Fixed Effects | Yes | Yes | Yes | Yes | Yes | Yes |
| Industry Fixed Effects | Yes | Yes | Yes | Yes | Yes | Yes |
| Observations | 964 | 483 | 964 | 483 | 964 | 483 |
| R-squared | 0.383 | 0.389 | 0.382 | 0.380 | 0.383 | 0.381 |

Table 11 reports the relationship between KPI disclosure and ownership by funds classified as nonsustainable by the Sustainable Investment Overall (No). The dependent variable corresponds to the natural logarithm of the fund value held by funds classified as unsustainable by the Sustainable Investment Overall (No). Definitions of the independent variables are provided in the paper. *, **, and *** denote significance at the 10%, 5%, and 1% levels, respectively. Robust standard errors are applied, and t statistics are shown in parentheses.

**Table 11. Relationship between KPI levels and OEF fund ownership – SIO (No)**

|  | (1) | (2) | (3) | (4) | (5) | (6) |
| --- | --- | --- | --- | --- | --- | --- |
| Variable | Ln fund value held SIO (No) | Ln fund value held SIO (No) | Ln fund value held SIO (No) | Ln fund value held SIO (No) | Ln fund value held SIO (No) | Ln fund value held SIO (No) |
|  |  |  |  |  |  |  |
| TO eli | -0.624*** |  |  |  |  |  |
|  | (0.106) |  |  |  |  |  |
| TO ali |  | -0.709** |  |  |  |  |
|  |  | (0.288) |  |  |  |  |
| OPEX eli |  |  | -0.546*** |  |  |  |
|  |  |  | (0.112) |  |  |  |
| OPEX ali |  |  |  | -0.872*** |  |  |
|  |  |  |  | (0.305) |  |  |
| CAPEX eli |  |  |  |  | -0.653*** |  |
|  |  |  |  |  | (0.0916) |  |
| CAPEX ali |  |  |  |  |  | -0.902*** |
|  |  |  |  |  |  | (0.222) |
| Size | 0.420*** | 0.383*** | 0.412*** | 0.390*** | 0.429*** | 0.396*** |
|  | (0.0351) | (0.0539) | (0.0344) | (0.0530) | (0.0349) | (0.0539) |
| ROA | 4.391*** | 4.483*** | 4.431*** | 4.542*** | 4.372*** | 4.541*** |
|  | (0.474) | (0.738) | (0.471) | (0.740) | (0.482) | (0.747) |
| Leverage | -0.0681* | -0.0628 | -0.0811** | -0.0699 | -0.0838** | -0.0696 |
|  | (0.0352) | (0.0480) | (0.0362) | (0.0473) | (0.0357) | (0.0475) |
| Number of Analysts | 0.0595*** | 0.0685*** | 0.0614*** | 0.0684*** | 0.0596*** | 0.0675*** |
|  | (0.00604) | (0.00950) | (0.00598) | (0.00950) | (0.00595) | (0.00950) |
| Constant | 12.93*** | 13.38*** | 13.00*** | 13.28*** | 12.82*** | 13.21*** |
|  | (0.519) | (0.800) | (0.512) | (0.789) | (0.517) | (0.799) |
| Year Fixed Effects | Yes | Yes | Yes | Yes | Yes | Yes |
| Industry Fixed Effects | Yes | Yes | Yes | Yes | Yes | Yes |
| Observations | 965 | 484 | 965 | 484 | 965 | 484 |
| R-squared | 0.523 | 0.494 | 0.519 | 0.498 | 0.529 | 0.501 |

**5.2.3. Endogeneity concerns**

Table 12 presents the first-stage results of the two-stage least squares (IV-2SLS) estimation. The objective is to assess the relevance of our instrument (instr_sector). The dependent variable corresponds to one of the six relevant KPIs—TO_eli, TO_ali, CAPEX_eli, CAPEX_ali, OPEX_eli, or OPEX_ali. Definitions of the independent variables are provided in the paper. *, **, and *** denote significance at the 10%, 5%, and 1% levels, respectively. Robust standard errors are applied, and t statistics are shown in parentheses.

**Table 12. Two-stage least squares (IV-2SLS) approach - First stage**

|  | (1) | (2) | (3) | (4) | (5) | (6) |
| --- | --- | --- | --- | --- | --- | --- |
| Variable | TO eli | TO ali | CAPEX eli | CAPEX ali | OPEX eli | OPEX ali |
|  |  |  |  |  |  |  |
| instr_sector | 0.837*** |  |  |  |  |  |
|  | (0.0844) |  |  |  |  |  |
| instr_sector2 |  | 0.923*** |  |  |  |  |
|  |  | (0.157) |  |  |  |  |
| instr_sector3 |  |  | 0.818*** |  |  |  |
|  |  |  | (0.0810) |  |  |  |
| instr_sector4 |  |  |  | 0.940*** |  |  |
|  |  |  |  | (0.118) |  |  |
| instr_sector5 |  |  |  |  | 0.853*** |  |
|  |  |  |  |  | (0.0905) |  |
| instr_sector6 |  |  |  |  |  | 0.958*** |
|  |  |  |  |  |  | (0.130) |
| Size | 0.0464*** | -0.000975 | 0.0587*** | 0.0136** | 0.0409*** | 0.00684 |
|  | (0.00966) | (0.00547) | (0.00962) | (0.00652) | (0.00930) | (0.00645) |
| ROA | -0.0718 | -0.0826 | -0.105 | 0.00149 | 0.000266 | -0.000699 |
|  | (0.133) | (0.0953) | (0.137) | (0.0940) | (0.127) | (0.0940) |
| Leverage | 0.00588 | -0.00128 | -0.0163 | -0.00829 | -0.0135 | -0.00899 |
|  | (0.0139) | (0.00743) | (0.0133) | (0.00852) | (0.0116) | (0.00667) |
| Number of Analysts | -0.00415*** | 0.000136 | -0.00386** | -0.000914 | -0.00135 | 8.48e-05 |
|  | (0.00145) | (0.00117) | (0.00163) | (0.00135) | (0.00132) | (0.00111) |
| Constant | -0.652*** | 0.0245 | -0.822*** | -0.195** | -0.609*** | -0.103 |
|  | (0.141) | (0.0781) | (0.138) | (0.0920) | (0.137) | (0.0950) |
| Year Fixed Effects | Yes | Yes | Yes | Yes | Yes | Yes |
| Observations | 966 | 484 | 966 | 484 | 966 | 484 |
| R-squared | 0.228 | 0.235 | 0.227 | 0.400 | 0.210 | 0.384 |

**Table 13. Two-stage least squares (IV-2SLS) approach – Second stage (SIO variables)**

This table reports the second-stage results of the two-stage least squares (IV-2SLS) estimation. The dependent variable is the percentage of shares held by funds classified under the Sustainable Investment Overall indicator (Yes/No). Definitions of the independent variables are provided in the paper. *, **, and *** denote significance at the 10%, 5%, and 1% levels, respectively. Robust standard errors are applied, and t statistics are shown in parentheses.

|  | (1) | (2) | (3) | (4) | (5) | (6) | (7) | (8) | (9) | (10) | (11) | (12) |
| --- | --- | --- | --- | --- | --- | --- | --- | --- | --- | --- | --- | --- |
| Variable | % Shares SIO (Yes) | % Shares SIO (Yes) | % Shares SIO (Yes) | % Shares SIO (Yes) | % Shares SIO (Yes) | % Shares SIO (Yes) | % Shares SIO (No) | % Shares SIO (No) | % Shares SIO (No) | % Shares SIO (No) | % Shares SIO (No) | % Shares SIO (No) |
|  |  |  |  |  |  |  |  |  |  |  |  |  |
| TO eli | 2.499*** |  |  |  |  |  | 2.779 |  |  |  |  |  |
|  | (0.858) |  |  |  |  |  | (2.389) |  |  |  |  |  |
| TO ali |  | 7.320*** |  |  |  |  |  | -3.625 |  |  |  |  |
|  |  | (2.634) |  |  |  |  |  | (5.914) |  |  |  |  |
| CAPEX eli |  |  | 2.728*** |  |  |  |  |  | 1.007 |  |  |  |
|  |  |  | (0.962) |  |  |  |  |  | (2.403) |  |  |  |
| CAPEX ali |  |  |  | 4.114** |  |  |  |  |  | -3.538 |  |  |
|  |  |  |  | (1.669) |  |  |  |  |  | (3.413) |  |  |
| OPEX eli |  |  |  |  | 3.276*** |  |  |  |  |  | 0.200 |  |
|  |  |  |  |  | (1.096) |  |  |  |  |  | (2.675) |  |
| OPEX ali |  |  |  |  |  | 4.753** |  |  |  |  |  | -3.884 |
|  |  |  |  |  |  | (1.892) |  |  |  |  |  | (3.890) |
| Size | -0.791*** | -0.745*** | -0.850*** | -0.802*** | -0.821*** | -0.775*** | -2.937*** | -2.557*** | -2.835*** | -2.466*** | -2.763*** | -2.496*** |
|  | (0.113) | (0.129) | (0.126) | (0.145) | (0.116) | (0.137) | (0.316) | (0.385) | (0.334) | (0.402) | (0.309) | (0.392) |
| ROA | -0.370 | 1.645 | -0.243 | 1.031 | -0.435 | 1.077 | 5.022 | 3.261 | 5.034 | 3.571 | 4.969 | 3.533 |
|  | (1.538) | (2.201) | (1.524) | (2.328) | (1.527) | (2.282) | (4.260) | (5.743) | (4.187) | (5.757) | (4.174) | (5.750) |
| Leverage | -0.148 | -0.137 | -0.114 | -0.112 | -0.119 | -0.111 | -0.424 | -0.437 | -0.376 | -0.411 | -0.372 | -0.417 |
|  | (0.148) | (0.173) | (0.150) | (0.182) | (0.149) | (0.182) | (0.351) | (0.457) | (0.339) | (0.458) | (0.336) | (0.457) |
| Number of Analysts | 0.0498*** | 0.0414* | 0.0506*** | 0.0421* | 0.0436** | 0.0376 | 0.230*** | 0.174** | 0.214*** | 0.167** | 0.207*** | 0.171** |
|  | (0.0187) | (0.0249) | (0.0189) | (0.0249) | (0.0176) | (0.0246) | (0.0552) | (0.0781) | (0.0543) | (0.0780) | (0.0515) | (0.0772) |
| Constant | 15.89*** | 15.14*** | 16.53*** | 16.11*** | 16.31*** | 15.78*** | 63.02*** | 58.56*** | 61.79*** | 57.28*** | 60.97*** | 57.64*** |
|  | (1.654) | (1.910) | (1.762) | (2.140) | (1.690) | (2.058) | (4.586) | (5.747) | (4.721) | (5.987) | (4.502) | (5.885) |
| Year Fixed Effects | Yes | Yes | Yes | Yes | Yes | Yes | Yes | Yes | Yes | Yes | Yes | Yes |
| Observations | 966 | 484 | 966 | 484 | 966 | 484 | 966 | 484 | 966 | 484 | 966 | 484 |
| R-squared | 0.073 | 0.137 | 0.067 | 0.103 | 0.060 | 0.109 | 0.103 | 0.142 | 0.122 | 0.149 | 0.136 | 0.143 |

**Table 14. Two-stage least squares (IV-2SLS) approach – Second stage (MSR variables)**

This table reports the second-stage results of the two-stage least squares (IV-2SLS) estimation. The dependent variable is the percentage of shares held by funds classified as 4-globes or 5-globes in the Morningstar Sustainability Rating. Definitions of the independent variables are provided in the paper. *, **, and *** denote significance at the 10%, 5%, and 1% levels, respectively. Robust standard errors are applied, and t statistics are shown in parentheses.

|  | (1) | (2) | (3) | (4) | (5) | (6) | (7) | (8) | (9) | (10) | (11) | (12) |
| --- | --- | --- | --- | --- | --- | --- | --- | --- | --- | --- | --- | --- |
| Variable | % shares MSR (5-G) | % shares MSR (5-G) | % shares MSR (5-G) | % shares MSR (5-G) | % shares MSR (5-G) | % shares MSR (5-G) | % shares MSR (4-G) | % shares MSR (4-G) | % shares MSR (4-G) | % shares MSR (4-G) | % shares MSR (4-G) | % shares MSR (4-G) |
|  |  |  |  |  |  |  |  |  |  |  |  |  |
| TO eli | 3.077*** |  |  |  |  |  | 2.415*** |  |  |  |  |  |
|  | (0.686) |  |  |  |  |  | (0.874) |  |  |  |  |  |
| TO ali |  | 3.794*** |  |  |  |  |  | 6.524** |  |  |  |  |
|  |  | (1.175) |  |  |  |  |  | (3.282) |  |  |  |  |
| CAPEX eli |  |  | 2.548*** |  |  |  |  |  | 2.505** |  |  |  |
|  |  |  | (0.633) |  |  |  |  |  | (1.007) |  |  |  |
| CAPEX ali |  |  |  | 1.587** |  |  |  |  |  | 3.616* |  |  |
|  |  |  |  | (0.658) |  |  |  |  |  | (1.997) |  |  |
| OPEX eli |  |  |  |  | 2.287*** |  |  |  |  |  | 2.639** |  |
|  |  |  |  |  | (0.647) |  |  |  |  |  | (1.188) |  |
| OPEX ali |  |  |  |  |  | 1.970*** |  |  |  |  |  | 4.450* |
|  |  |  |  |  |  | (0.730) |  |  |  |  |  | (2.330) |
| Size | -0.680*** | -0.545*** | -0.685*** | -0.552*** | -0.612*** | -0.545*** | -1.221*** | -1.197*** | -1.267*** | -1.245*** | -1.218*** | -1.230*** |
|  | (0.0777) | (0.0746) | (0.0798) | (0.0800) | (0.0724) | (0.0779) | (0.107) | (0.128) | (0.124) | (0.147) | (0.115) | (0.139) |
| ROA | 2.756*** | 3.700*** | 2.862*** | 3.384** | 2.686*** | 3.403*** | 1.693 | 2.518 | 1.808 | 1.971 | 1.633 | 2.013 |
|  | (1.045) | (1.260) | (1.015) | (1.333) | (1.007) | (1.316) | (1.493) | (1.770) | (1.477) | (1.830) | (1.490) | (1.810) |
| Leverage | -0.0290 | -0.0864 | 0.0167 | -0.0594 | 0.0171 | -0.0619 | -0.00300 | 0.0772 | 0.0303 | 0.101 | 0.0284 | 0.0962 |
|  | (0.0962) | (0.0897) | (0.0913) | (0.0937) | (0.0909) | (0.0937) | (0.158) | (0.225) | (0.158) | (0.232) | (0.156) | (0.230) |
| Number of Analysts | 0.0813*** | 0.0696*** | 0.0757*** | 0.0672*** | 0.0656*** | 0.0659*** | 0.117*** | 0.121*** | 0.117*** | 0.122*** | 0.109*** | 0.119*** |
|  | (0.0123) | (0.0146) | (0.0120) | (0.0145) | (0.0110) | (0.0143) | (0.0179) | (0.0247) | (0.0182) | (0.0241) | (0.0167) | (0.0237) |
| Constant | 11.47*** | 9.761*** | 11.49*** | 9.974*** | 10.71*** | 9.900*** | 22.18*** | 21.65*** | 22.68*** | 22.48*** | 22.21*** | 22.30*** |
|  | (1.115) | (1.140) | (1.110) | (1.221) | (1.055) | (1.198) | (1.562) | (1.878) | (1.736) | (2.156) | (1.674) | (2.065) |
| Year Fixed Effects | Yes | Yes | Yes | Yes | Yes | Yes | Yes | Yes | Yes | Yes | Yes | Yes |
| Observations | 966 | 484 | 966 | 484 | 966 | 484 | 966 | 484 | 966 | 484 | 966 | 484 |
| R-squared | 0.028 | 0.136 | 0.037 | 0.116 | 0.050 | 0.120 | 0.104 | 0.108 | 0.086 | 0.123 | 0.103 | 0.126 |

Table 15 reports the second-stage results of the two-stage least squares (IV-2SLS) estimation. The dependent variable is the percentage of shares held by funds classified as 3-globes in the Morningstar Sustainability Rating. Definitions of the independent variables are provided in the paper. *, **, and *** denote significance at the 10%, 5%, and 1% levels, respectively. Robust standard errors are applied, and t statistics are shown in parentheses.

**Table 15. Two-stage least squares (IV-2SLS) approach – Second stage (MSR variables)**

|  | (1) | (2) | (3) | (4) | (5) | (6) |
| --- | --- | --- | --- | --- | --- | --- |
| Variable | % shares MSR (3-G) | % shares MSR (3-G) | % shares MSR (3-G) | % shares MSR (3-G) | % shares MSR (3-G) | % shares MSR (3-G) |
|  |  |  |  |  |  |  |
| TO eli | 1.155 |  |  |  |  |  |
|  | (1.110) |  |  |  |  |  |
| TO ali |  | -1.565 |  |  |  |  |
|  |  | (2.155) |  |  |  |  |
| CAPEX eli |  |  | 0.264 |  |  |  |
|  |  |  | (1.041) |  |  |  |
| CAPEX ali |  |  |  | -1.702 |  |  |
|  |  |  |  | (1.186) |  |  |
| OPEX eli |  |  |  |  | -0.162 |  |
|  |  |  |  |  | (1.174) |  |
| OPEX ali |  |  |  |  |  | -1.861 |
|  |  |  |  |  |  | (1.327) |
| Size | -1.247*** | -1.094*** | -1.191*** | -1.047*** | -1.160*** | -1.062*** |
|  | (0.128) | (0.157) | (0.135) | (0.163) | (0.125) | (0.160) |
| ROA | -0.0109 | -0.891 | -0.0158 | -0.756 | -0.0318 | -0.775 |
|  | (1.771) | (2.399) | (1.747) | (2.407) | (1.744) | (2.406) |
| Leverage | -0.360*** | -0.425** | -0.339** | -0.409** | -0.337** | -0.412** |
|  | (0.139) | (0.167) | (0.135) | (0.168) | (0.135) | (0.168) |
| Number of Analysts | 0.0522** | 0.0379 | 0.0445* | 0.0336 | 0.0416* | 0.0359 |
|  | (0.0240) | (0.0338) | (0.0239) | (0.0340) | (0.0231) | (0.0339) |
| Constant | 26.78*** | 24.94*** | 26.12*** | 24.29*** | 25.75*** | 24.47*** |
|  | (1.906) | (2.494) | (1.958) | (2.561) | (1.875) | (2.539) |
| Year Fixed Effects | Yes | Yes | Yes | Yes | Yes | Yes |
| Observations | 966 | 484 | 966 | 484 | 966 | 484 |
| R-squared | 0.128 | 0.137 | 0.139 | 0.139 | 0.143 | 0.134 |

**Table 16. Two-stage least squares (IV-2SLS) approach – Second stage (MSR variables)**

Table 16 reports the second-stage results of the two-stage least squares (IV-2SLS) estimation. The dependent variable is the percentage of shares held by funds classified as 1-globe or 2-globes in the Morningstar Sustainability Rating. Definitions of the independent variables are provided in the paper. *, **, and *** denote significance at the 10%, 5%, and 1% levels, respectively. Robust standard errors are applied, and t statistics are shown in parentheses.

|  | (1) | (2) | (3) | (4) | (5) | (6) | (7) | (8) | (9) | (10) | (11) | (12) |
| --- | --- | --- | --- | --- | --- | --- | --- | --- | --- | --- | --- | --- |
| Variable | % shares MSR (1-G) | % shares MSR (1-G) | % shares MSR (1-G) | % shares MSR (1-G) | % shares MSR (1-G) | % shares MSR (1-G) | % shares MSR (2-G) | % shares MSR (2-G) | % shares MSR (2-G) | % shares MSR (2-G) | % shares MSR (2-G) | % shares MSR (2-G) |
|  |  |  |  |  |  |  |  |  |  |  |  |  |
| TO eli | -0.998*** |  |  |  |  |  | -1.688** |  |  |  |  |  |
|  | (0.300) |  |  |  |  |  | (0.856) |  |  |  |  |  |
| TO ali |  | -2.249*** |  |  |  |  |  | -3.955* |  |  |  |  |
|  |  | (0.868) |  |  |  |  |  | (2.376) |  |  |  |  |
| CAPEX eli |  |  | -0.937*** |  |  |  |  |  | -1.833** |  |  |  |
|  |  |  | (0.325) |  |  |  |  |  | (0.859) |  |  |  |
| CAPEX ali |  |  |  | -1.086** |  |  |  |  |  | -2.332* |  |  |
|  |  |  |  | (0.496) |  |  |  |  |  | (1.369) |  |  |
| OPEX eli |  |  |  |  | -0.906** |  |  |  |  |  | -1.404 |  |
|  |  |  |  |  | (0.359) |  |  |  |  |  | (1.013) |  |
| OPEX ali |  |  |  |  |  | -1.420** |  |  |  |  |  | -2.779* |
|  |  |  |  |  |  | (0.554) |  |  |  |  |  | (1.553) |
| Size | 0.139*** | 0.155*** | 0.150*** | 0.165*** | 0.127*** | 0.163*** | -0.411*** | -0.382** | -0.372*** | -0.347* | -0.440*** | -0.360** |
|  | (0.0460) | (0.0563) | (0.0501) | (0.0601) | (0.0457) | (0.0577) | (0.127) | (0.173) | (0.132) | (0.179) | (0.128) | (0.175) |
| ROA | -1.340** | -1.464* | -1.382** | -1.276 | -1.317** | -1.290 | 1.336 | 0.921 | 1.251 | 1.253 | 1.375 | 1.226 |
|  | (0.577) | (0.828) | (0.571) | (0.827) | (0.567) | (0.825) | (1.659) | (2.445) | (1.659) | (2.423) | (1.660) | (2.425) |
| Leverage | -0.0350 | -0.0426 | -0.0492 | -0.0550 | -0.0490 | -0.0516 | -0.140 | -0.0677 | -0.163 | -0.0786 | -0.165 | -0.0774 |
|  | (0.0507) | (0.0739) | (0.0499) | (0.0728) | (0.0503) | (0.0727) | (0.132) | (0.194) | (0.131) | (0.194) | (0.135) | (0.195) |
| Number of Analysts | -0.0207*** | -0.0255** | -0.0198*** | -0.0249** | -0.0163** | -0.0242** | 0.0244 | -0.00890 | 0.0239 | -0.00983 | 0.0323 | -0.00755 |
|  | (0.00733) | (0.0104) | (0.00716) | (0.0104) | (0.00665) | (0.0102) | (0.0244) | (0.0386) | (0.0236) | (0.0385) | (0.0231) | (0.0382) |
| Constant | -0.480 | -0.680 | -0.591 | -0.883 | -0.354 | -0.861 | 13.46*** | 13.44*** | 13.04*** | 12.86*** | 13.77*** | 13.01*** |
|  | (0.665) | (0.843) | (0.705) | (0.899) | (0.665) | (0.871) | (1.754) | (2.401) | (1.807) | (2.490) | (1.778) | (2.450) |
| Year Fixed Effects | Yes | Yes | Yes | Yes | Yes | Yes | Yes | Yes | Yes | Yes | Yes | Yes |
| Observations | 966 | 484 | 966 | 484 | 966 | 484 | 966 | 484 | 966 | 484 | 966 | 484 |
| R-squared | 0.033 | 0.041 | 0.037 | 0.055 | 0.037 | 0.056 | 0.079 | 0.070 | 0.098 | 0.073 | 0.071 | 0.065 |

**5.2.4. Alternative controls and omitted variable robustness**

**Table 17. Relationship between KPI disclosure and fund ownership**

This table reports the relationship between KPI disclosure and ownership for sustainable and nonsustainable funds. The dependent variable is the percentage of shares held by funds classified by (i) the Morningstar Sustainability Rating (1 to 5 globes) or (ii) the Sustainable Investment Overall indicator (Yes/No) from the Morningstar database. Definitions of the independent variables are provided in the paper. *, **, and *** denote significance at the 10%, 5%, and 1% levels, respectively. Robust standard errors are applied, and t statistics are shown in parentheses.

|  | (1) | (2) | (3) | (4) | (5) | (6) | (7) |
| --- | --- | --- | --- | --- | --- | --- | --- |
| Variable | % shares MSR (1-G) | % shares MSR (2-G) | % shares MSR (3-G) | % shares MSR (4-G) | % shares MSR (5-G) | % Shares SIO (Yes) | % Shares SIO (No) |
|  |  |  |  |  |  |  |  |
| KPI Disclosure | -0.476*** | -3.654*** | -1.134*** | -0.714*** | 0.189 | -0.0475 | -6.604*** |
|  | (0.102) | (0.256) | (0.290) | (0.256) | (0.175) | (0.278) | (0.652) |
| Size_bis | -0.170*** | -0.271** | -0.891*** | -0.758*** | -0.163* | -0.487*** | -2.012*** |
|  | (0.0481) | (0.122) | (0.161) | (0.110) | (0.0831) | (0.123) | (0.328) |
| ROA_bis | 0.428 | 2.810* | 2.911* | 3.730** | 2.916*** | 1.192 | 12.97*** |
|  | (0.519) | (1.496) | (1.761) | (1.598) | (1.093) | (1.904) | (3.994) |
| Leverage_bis | -0.0244 | 0.557 | -1.362 | 0.952 | 2.260*** | 0.797 | 1.714 |
|  | (0.329) | (0.894) | (1.137) | (1.048) | (0.647) | (1.027) | (2.422) |
| Number of Analysts | 0.00652 | 0.0261 | 0.0175 | 0.0726*** | 0.0283** | 0.0173 | 0.154*** |
|  | (0.00624) | (0.0204) | (0.0286) | (0.0193) | (0.0118) | (0.0194) | (0.0565) |
| CEO_Chairman_Duality | -0.151** | -0.421* | -0.830** | -0.299 | -0.247 | 0.0738 | -2.147*** |
|  | (0.0758) | (0.253) | (0.352) | (0.240) | (0.167) | (0.269) | (0.723) |
| PtB_per_Share | -0.0647*** | -0.0364 | 0.101** | 0.107*** | 0.0649*** | 0.0578 | 0.106 |
|  | (0.0104) | (0.0246) | (0.0414) | (0.0333) | (0.0234) | (0.0399) | (0.0810) |
| Constant | 4.541*** | 13.30*** | 22.52*** | 15.02*** | 3.550*** | 11.59*** | 52.50*** |
|  | (0.750) | (1.823) | (2.380) | (1.659) | (1.214) | (1.744) | (4.941) |
| Year Fixed Effects | Yes | Yes | Yes | Yes | Yes | Yes | Yes |
| Industry Fixed Effects | Yes | Yes | Yes | Yes | Yes | Yes | Yes |
| Observations | 930 | 930 | 930 | 930 | 930 | 930 | 930 |
| R-squared | 0.152 | 0.275 | 0.149 | 0.153 | 0.112 | 0.072 | 0.249 |

**Table 18. Relationship between KPI disclosure and fund ownership - MSR (1-G)**

This table reports the relationship between KPI disclosure and ownership by funds classified as 1-globe in the Morningstar Sustainability Rating. The dependent variable is the percentage of shares held by funds classified as 1-globe in the Morningstar Sustainability Rating. Definitions of the independent variables are provided in the paper. *, **, and *** denote significance at the 10%, 5%, and 1% levels, respectively. Robust standard errors are applied, and t statistics are shown in parentheses.

|  | (1) | (2) | (3) | (4) | (5) | (6) |
| --- | --- | --- | --- | --- | --- | --- |
| Variable | % shares MSR (1-G) | % shares MSR (1-G) | % shares MSR (1-G) | % shares MSR (1-G) | % shares MSR (1-G) | % shares MSR (1-G) |
|  |  |  |  |  |  |  |
| TO eli | -0.489*** |  |  |  |  |  |
|  | (0.120) |  |  |  |  |  |
| TO ali |  | -1.307*** |  |  |  |  |
|  |  | (0.304) |  |  |  |  |
| OPEX eli |  |  | -0.529*** |  |  |  |
|  |  |  | (0.116) |  |  |  |
| OPEX ali |  |  |  | -1.519*** |  |  |
|  |  |  |  | (0.349) |  |  |
| CAPEX eli |  |  |  |  | -0.488*** |  |
|  |  |  |  |  | (0.127) |  |
| CAPEX ali |  |  |  |  |  | -1.407*** |
|  |  |  |  |  |  | (0.345) |
| Size_bis | -0.177*** | -0.121* | -0.181*** | -0.114* | -0.174*** | -0.108 |
|  | (0.0487) | (0.0682) | (0.0484) | (0.0673) | (0.0487) | (0.0672) |
| ROA_bis | 0.656 | 0.791 | 0.696 | 0.769 | 0.633 | 0.743 |
|  | (0.517) | (0.813) | (0.516) | (0.807) | (0.516) | (0.805) |
| Leverage_bis | 0.0868 | 0.355 | -0.00189 | 0.224 | 0.0192 | 0.275 |
|  | (0.335) | (0.506) | (0.334) | (0.510) | (0.333) | (0.505) |
| Number of Analysts | 0.00579 | -0.000889 | 0.00761 | -0.000209 | 0.00622 | -0.00159 |
|  | (0.00647) | (0.0100) | (0.00637) | (0.01000) | (0.00641) | (0.0100) |
| CEO_Chairman_Duality | -0.221*** | -0.261** | -0.237*** | -0.272** | -0.197** | -0.253** |
|  | (0.0770) | (0.122) | (0.0772) | (0.122) | (0.0765) | (0.121) |
| PtB_per_Share | -0.0665*** | -0.0711*** | -0.0657*** | -0.0720*** | -0.0676*** | -0.0737*** |
|  | (0.0105) | (0.0179) | (0.0105) | (0.0178) | (0.0106) | (0.0180) |
| Constant | 4.333*** | 3.699*** | 4.356*** | 3.627*** | 4.312*** | 3.579*** |
|  | (0.756) | (1.063) | (0.752) | (1.052) | (0.755) | (1.049) |
| Year Fixed Effects | Yes | Yes | Yes | Yes | Yes | Yes |
| Industry Fixed Effect | Yes | Yes | Yes | Yes | Yes | Yes |
| Observations | 930 | 467 | 930 | 467 | 930 | 467 |
| R-squared | 0.136 | 0.120 | 0.138 | 0.127 | 0.138 | 0.129 |

**Table 19. Relationship between KPI disclosure and fund ownership - MSR (2-G)**

This table reports the relationship between KPI disclosure and ownership by funds classified as 2-globes in the Morningstar Sustainability Rating. The dependent variable is the percentage of shares held by funds classified as 2-globes in the Morningstar Sustainability Rating. Definitions of the independent variables are provided in the paper. *, **, and *** denote significance at the 10%, 5%, and 1% levels, respectively. Robust standard errors are applied, and t statistics are shown in parentheses.

|  | (1) | (2) | (3) | (4) | (5) | (6) |
| --- | --- | --- | --- | --- | --- | --- |
| Variable | % shares MSR (2-G) | % shares MSR (2-G) | % shares MSR (2-G) | % shares MSR (2-G) | % shares MSR (2-G) | % shares MSR (2-G) |
|  |  |  |  |  |  |  |
| TO eli | -3.316*** |  |  |  |  |  |
|  | (0.380) |  |  |  |  |  |
| TO ali |  | -5.214*** |  |  |  |  |
|  |  | (1.102) |  |  |  |  |
| OPEX eli |  |  | -3.052*** |  |  |  |
|  |  |  | (0.366) |  |  |  |
| OPEX ali |  |  |  | -4.905*** |  |  |
|  |  |  |  | (1.097) |  |  |
| CAPEX eli |  |  |  |  | -3.546*** |  |
|  |  |  |  |  | (0.355) |  |
| CAPEX ali |  |  |  |  |  | -5.481*** |
|  |  |  |  |  |  | (0.860) |
| Size_bis | -0.337** | -0.377* | -0.376*** | -0.357* | -0.312** | -0.327* |
|  | (0.137) | (0.200) | (0.135) | (0.200) | (0.134) | (0.197) |
| ROA_bis | 4.720*** | 4.840** | 5.128*** | 4.860** | 4.463*** | 4.664* |
|  | (1.582) | (2.422) | (1.586) | (2.405) | (1.599) | (2.439) |
| Leverage_bis | 1.376 | 1.180 | 0.826 | 0.754 | 0.903 | 0.867 |
|  | (0.965) | (1.389) | (0.978) | (1.426) | (0.957) | (1.390) |
| Number of Analysts | 0.0214 | 0.0148 | 0.0331 | 0.0171 | 0.0240 | 0.0120 |
|  | (0.0224) | (0.0330) | (0.0221) | (0.0335) | (0.0219) | (0.0333) |
| CEO_Chairman_Duality | -0.971*** | -1.052** | -1.081*** | -1.097*** | -0.789*** | -1.023** |
|  | (0.274) | (0.422) | (0.273) | (0.421) | (0.269) | (0.421) |
| PtB_per_Share | -0.0478* | -0.0261 | -0.0410 | -0.0296 | -0.0567** | -0.0364 |
|  | (0.0269) | (0.0390) | (0.0271) | (0.0390) | (0.0273) | (0.0394) |
| Constant | 11.82*** | 12.42*** | 12.09*** | 12.17*** | 11.60*** | 11.95*** |
|  | (2.040) | (2.929) | (2.013) | (2.917) | (1.985) | (2.871) |
| Year Fixed Effects | Yes | Yes | Yes | Yes | Yes | Yes |
| Industry Fixed Effects | Yes | Yes | Yes | Yes | Yes | Yes |
| Observations | 930 | 467 | 930 | 467 | 930 | 467 |
| R-squared | 0.142 | 0.112 | 0.135 | 0.110 | 0.163 | 0.131 |

**Table 20. Relationship between KPI disclosure and fund ownership - MSR (3-G)**

This table reports the relationship between KPI disclosure and ownership by funds classified as 3-globes in the Morningstar Sustainability Rating. The dependent variable is the percentage of shares held by funds classified as 3-globes in the Morningstar Sustainability Rating. Definitions of the independent variables are provided in the paper. *, **, and *** denote significance at the 10%, 5%, and 1% levels, respectively. Robust standard errors are applied, and t statistics are shown in parentheses.

|  | (1) | (2) | (3) | (4) | (5) | (6) |
| --- | --- | --- | --- | --- | --- | --- |
| Variable | % shares MSR (3-G) | % shares MSR (3-G) | % shares MSR (3-G) | % shares MSR (3-G) | % shares MSR (3-G) | % shares MSR (3-G) |
|  |  |  |  |  |  |  |
| TO eli | -1.795*** |  |  |  |  |  |
|  | (0.417) |  |  |  |  |  |
| TO ali |  | -1.922* |  |  |  |  |
|  |  | (1.054) |  |  |  |  |
| OPEX eli |  |  | -1.306*** |  |  |  |
|  |  |  | (0.450) |  |  |  |
| OPEX ali |  |  |  | -0.954 |  |  |
|  |  |  |  | (1.080) |  |  |
| CAPEX eli |  |  |  |  | -1.868*** |  |
|  |  |  |  |  | (0.397) |  |
| CAPEX ali |  |  |  |  |  | -2.111** |
|  |  |  |  |  |  | (1.011) |
| Size_bis | -0.888*** | -1.004*** | -0.916*** | -1.002*** | -0.876*** | -0.985*** |
|  | (0.163) | (0.214) | (0.161) | (0.214) | (0.162) | (0.214) |
| ROA_bis | 3.225* | 2.831 | 3.537** | 2.918 | 3.107* | 2.756 |
|  | (1.752) | (2.451) | (1.752) | (2.414) | (1.762) | (2.474) |
| Leverage_bis | -1.048 | -2.002 | -1.312 | -2.087 | -1.301 | -2.122 |
|  | (1.149) | (1.589) | (1.146) | (1.602) | (1.141) | (1.596) |
| Number of Analysts | 0.0143 | 0.0420 | 0.0202 | 0.0425 | 0.0158 | 0.0409 |
|  | (0.0288) | (0.0400) | (0.0285) | (0.0402) | (0.0287) | (0.0400) |
| CEO_Chairman_Duality | -0.972*** | -0.823 | -1.034*** | -0.841* | -0.878** | -0.811 |
|  | (0.348) | (0.503) | (0.347) | (0.502) | (0.352) | (0.504) |
| PtB_per_Share | 0.0944** | 0.104 | 0.0989** | 0.103 | 0.0899** | 0.100 |
|  | (0.0408) | (0.0670) | (0.0409) | (0.0666) | (0.0410) | (0.0671) |
| Constant | 21.84*** | 23.28*** | 22.06*** | 23.23*** | 21.74*** | 23.10*** |
|  | (2.397) | (3.229) | (2.375) | (3.230) | (2.375) | (3.225) |
| Year Fixed Effects | Yes | Yes | Yes | Yes | Yes | Yes |
| Industry Fixed Effects | Yes | Yes | Yes | Yes | Yes | Yes |
| Observations | 930 | 467 | 930 | 467 | 930 | 467 |
| R-squared | 0.147 | 0.143 | 0.142 | 0.140 | 0.151 | 0.146 |

**Table 21. Relationship between KPI disclosure and fund ownership - MSR (4-G)**

This table reports the relationship between KPI disclosure and ownership by funds classified as 4-globes in the Morningstar Sustainability Rating. The dependent variable is the percentage of shares held by funds classified as 4-globes in the Morningstar Sustainability Rating. Definitions of the independent variables are provided in the paper. *, **, and *** denote significance at the 10%, 5%, and 1% levels, respectively. Robust standard errors are applied, and t statistics are shown in parentheses.

|  | (1) | (2) | (3) | (4) | (5) | (6) |
| --- | --- | --- | --- | --- | --- | --- |
| Variable | % shares MSR (4-G) | % shares MSR (4-G) | % shares MSR (4-G) | % shares MSR (4-G) | % shares MSR (4-G) | % shares MSR (4-G) |
|  |  |  |  |  |  |  |
| TO eli | -1.044** |  |  |  |  |  |
|  | (0.440) |  |  |  |  |  |
| TO ali |  | 0.700 |  |  |  |  |
|  |  | (1.776) |  |  |  |  |
| OPEX eli |  |  | -0.792* |  |  |  |
|  |  |  | (0.424) |  |  |  |
| OPEX ali |  |  |  | -0.277 |  |  |
|  |  |  |  | (1.871) |  |  |
| CAPEX eli |  |  |  |  | -1.080*** |  |
|  |  |  |  |  | (0.386) |  |
| CAPEX ali |  |  |  |  |  | -0.887 |
|  |  |  |  |  |  | (1.513) |
| Size_bis | -0.759*** | -1.027*** | -0.774*** | -1.024*** | -0.752*** | -1.016*** |
|  | (0.113) | (0.158) | (0.111) | (0.158) | (0.112) | (0.158) |
| ROA_bis | 3.959** | 6.098*** | 4.132*** | 6.009*** | 3.893** | 5.929*** |
|  | (1.593) | (2.176) | (1.591) | (2.233) | (1.601) | (2.260) |
| Leverage_bis | 1.143 | 1.215 | 0.986 | 1.194 | 0.997 | 1.169 |
|  | (1.063) | (1.714) | (1.049) | (1.635) | (1.046) | (1.649) |
| Number of Analysts | 0.0708*** | 0.108*** | 0.0743*** | 0.108*** | 0.0717*** | 0.107*** |
|  | (0.0194) | (0.0266) | (0.0193) | (0.0264) | (0.0194) | (0.0266) |
| CEO_Chairman_Duality | -0.392* | -0.757** | -0.428* | -0.750** | -0.338 | -0.738** |
|  | (0.236) | (0.321) | (0.235) | (0.321) | (0.239) | (0.323) |
| PtB_per_Share | 0.103*** | 0.0716 | 0.106*** | 0.0719 | 0.100*** | 0.0707 |
|  | (0.0338) | (0.0511) | (0.0336) | (0.0519) | (0.0338) | (0.0527) |
| Constant | 14.62*** | 17.86*** | 14.74*** | 17.85*** | 14.56*** | 17.80*** |
|  | (1.677) | (2.395) | (1.666) | (2.400) | (1.666) | (2.397) |
| Year Fixed Effects | Yes | Yes | Yes | Yes | Yes | Yes |
| Industry Fixed Effects | Yes | Yes | Yes | Yes | Yes | Yes |
| Observations | 930 | 467 | 930 | 467 | 930 | 467 |
| R-squared | 0.150 | 0.164 | 0.148 | 0.163 | 0.152 | 0.165 |

**Table 22. Relationship between KPI disclosure and fund ownership - MSR (5-G)**

This table reports the relationship between KPI disclosure and ownership by funds classified as 5-globes in the Morningstar Sustainability Rating. The dependent variable is the percentage of shares held by funds classified as 5-globes in the Morningstar Sustainability Rating. Definitions of the independent variables are provided in the paper. *, **, and *** denote significance at the 10%, 5%, and 1% levels, respectively. Robust standard errors are applied, and t statistics are shown in parentheses.

|  | (1) | (2) | (3) | (4) | (5) | (6) |
| --- | --- | --- | --- | --- | --- | --- |
| Variable | % shares MSR (5-G) | % shares MSR (5-G) | % shares MSR (5-G) | % shares MSR (5-G) | % shares MSR (5-G) | % shares MSR (5-G) |
|  |  |  |  |  |  |  |
| TO eli | 0.232 |  |  |  |  |  |
|  | (0.349) |  |  |  |  |  |
| TO ali |  | 3.278*** |  |  |  |  |
|  |  | (1.187) |  |  |  |  |
| OPEX eli |  |  | 0.193 |  |  |  |
|  |  |  | (0.333) |  |  |  |
| OPEX ali |  |  |  | 2.673** |  |  |
|  |  |  |  | (1.190) |  |  |
| CAPEX eli |  |  |  |  | 0.246 |  |
|  |  |  |  |  | (0.282) |  |
| CAPEX ali |  |  |  |  |  | 2.052** |
|  |  |  |  |  |  | (0.910) |
| Size_bis | -0.161* | -0.191* | -0.158* | -0.201* | -0.163* | -0.207* |
|  | (0.0850) | (0.113) | (0.0836) | (0.115) | (0.0845) | (0.117) |
| ROA_bis | 2.839*** | 3.514** | 2.805*** | 3.463** | 2.856*** | 3.459** |
|  | (1.093) | (1.413) | (1.085) | (1.461) | (1.087) | (1.500) |
| Leverage_bis | 2.213*** | 1.668** | 2.249*** | 1.901** | 2.246*** | 1.789** |
|  | (0.657) | (0.828) | (0.646) | (0.810) | (0.649) | (0.816) |
| Number of Analysts | 0.0287** | 0.0370** | 0.0279** | 0.0356** | 0.0285** | 0.0378** |
|  | (0.0119) | (0.0172) | (0.0117) | (0.0171) | (0.0119) | (0.0172) |
| CEO_Chairman_Duality | -0.220 | -0.215 | -0.213 | -0.187 | -0.233 | -0.214 |
|  | (0.166) | (0.231) | (0.166) | (0.232) | (0.165) | (0.235) |
| PtB_per_Share | 0.0658*** | 0.0629* | 0.0652*** | 0.0649* | 0.0664*** | 0.0673* |
|  | (0.0235) | (0.0363) | (0.0234) | (0.0372) | (0.0235) | (0.0379) |
| Constant | 3.643*** | 3.892** | 3.620*** | 4.029** | 3.658*** | 4.082** |
|  | (1.243) | (1.654) | (1.235) | (1.680) | (1.239) | (1.705) |
| Year Fixed Effects | Yes | Yes | Yes | Yes | Yes | Yes |
| Industry Fixed Effects | Yes | Yes | Yes | Yes | Yes | Yes |
| Observations | 930 | 467 | 930 | 467 | 930 | 467 |
| R-squared | 0.111 | 0.147 | 0.111 | 0.137 | 0.111 | 0.131 |

**Table 23. Relationship between KPI levels and OEF fund ownership – SIO (Yes)**

This table reports the relationship between KPI disclosure and ownership by funds classified as sustainable by the Sustainable Investment Overall (Yes). The dependent variable is the percentage of shares held by funds classified as sustainable by the Sustainable Investment Overall (Yes). Definitions of the independent variables are provided in the paper. *, **, and *** denote significance at the 10%, 5%, and 1% levels, respectively. Robust standard errors are applied, and t statistics are shown in parentheses.

|  | (1) | (2) | (3) | (4) | (5) | (6) |
| --- | --- | --- | --- | --- | --- | --- |
| Variable | % Shares SIO (Yes) | % Shares SIO (Yes) | % Shares SIO (Yes) | % Shares SIO (Yes) | % Shares SIO (Yes) | % Shares SIO (Yes) |
|  |  |  |  |  |  |  |
| TO eli | 1.563** |  |  |  |  |  |
|  | (0.712) |  |  |  |  |  |
| TO ali |  | 6.951** |  |  |  |  |
|  |  | (2.877) |  |  |  |  |
| OPEX eli |  |  | 1.318* |  |  |  |
|  |  |  | (0.689) |  |  |  |
| OPEX ali |  |  |  | 5.124* |  |  |
|  |  |  |  | (2.856) |  |  |
| CAPEX eli |  |  |  |  | 1.270** |  |
|  |  |  |  |  | (0.567) |  |
| CAPEX ali |  |  |  |  |  | 3.938* |
|  |  |  |  |  |  | (2.219) |
| Size_bis | -0.538*** | -0.607*** | -0.517*** | -0.625*** | -0.536*** | -0.637*** |
|  | (0.126) | (0.162) | (0.124) | (0.171) | (0.126) | (0.177) |
| ROA_bis | 1.802 | 3.019 | 1.578 | 2.861 | 1.757 | 2.852 |
|  | (1.854) | (2.591) | (1.846) | (2.751) | (1.847) | (2.855) |
| Leverage_bis | 0.682 | 1.071 | 0.930 | 1.520 | 0.881 | 1.305 |
|  | (1.048) | (1.557) | (1.012) | (1.464) | (1.025) | (1.510) |
| Number of Analysts | 0.0209 | 0.0286 | 0.0156 | 0.0260 | 0.0191 | 0.0301 |
|  | (0.0195) | (0.0270) | (0.0193) | (0.0267) | (0.0194) | (0.0269) |
| CEO_Chairman_Duality | 0.00632 | -0.144 | 0.0588 | -0.0829 | -0.0450 | -0.135 |
|  | (0.264) | (0.358) | (0.260) | (0.368) | (0.268) | (0.378) |
| PtB_per_Share | 0.0645 | 0.0390 | 0.0610 | 0.0433 | 0.0661 | 0.0478 |
|  | (0.0401) | (0.0528) | (0.0398) | (0.0556) | (0.0405) | (0.0580) |
| Constant | 12.01*** | 12.96*** | 11.86*** | 13.23*** | 11.99*** | 13.33*** |
|  | (1.793) | (2.282) | (1.790) | (2.392) | (1.794) | (2.461) |
| Year Fixed Effects | Yes | Yes | Yes | Yes | Yes | Yes |
| Industry Fixed Effects | Yes | Yes | Yes | Yes | Yes | Yes |
| Observations | 930 | 467 | 930 | 467 | 930 | 467 |
| R-squared | 0.085 | 0.142 | 0.081 | 0.115 | 0.082 | 0.105 |

**Table 24. Relationship between KPI levels and OEF fund ownership – SIO (No)**

This table reports the relationship between KPI disclosure and ownership by funds classified as nonsustainable by the Sustainable Investment Overall (No). The dependent variable is the percentage of shares held by funds classified as unsustainable by the Sustainable Investment Overall (No). Definitions of the independent variables are provided in the paper. *, **, and *** denote significance at the 10%, 5%, and 1% levels, respectively. Robust standard errors are applied, and t statistics are shown in parentheses.

|  | (1) | (2) | (3) | (4) | (5) | (6) |
| --- | --- | --- | --- | --- | --- | --- |
| Variable | % Shares SIO (No) | % Shares SIO (No) | % Shares SIO (No) | % Shares SIO (No) | % Shares SIO (No) | % Shares SIO (No) |
|  |  |  |  |  |  |  |
| TO eli | -8.569*** |  |  |  |  |  |
|  | (0.903) |  |  |  |  |  |
| TO ali |  | -11.75*** |  |  |  |  |
|  |  | (2.426) |  |  |  |  |
| OPEX eli |  |  | -7.357*** |  |  |  |
|  |  |  | (0.907) |  |  |  |
| OPEX ali |  |  |  | -10.56*** |  |  |
|  |  |  |  | (2.432) |  |  |
| CAPEX eli |  |  |  |  | -8.678*** |  |
|  |  |  |  |  | (0.846) |  |
| CAPEX ali |  |  |  |  |  | -12.39*** |
|  |  |  |  |  |  | (2.011) |
| Size_bis | -2.052*** | -2.391*** | -2.163*** | -2.349*** | -2.004*** | -2.277*** |
|  | (0.351) | (0.474) | (0.341) | (0.474) | (0.343) | (0.467) |
| ROA_bis | 15.48*** | 17.02*** | 16.67*** | 17.11*** | 15.02*** | 16.62*** |
|  | (4.043) | (6.006) | (4.053) | (5.932) | (4.102) | (6.072) |
| Leverage_bis | 3.394 | 1.443 | 2.024 | 0.524 | 2.202 | 0.735 |
|  | (2.491) | (3.464) | (2.531) | (3.536) | (2.481) | (3.462) |
| Number of Analysts | 0.139** | 0.199** | 0.169*** | 0.204** | 0.147** | 0.192** |
|  | (0.0588) | (0.0811) | (0.0575) | (0.0824) | (0.0582) | (0.0814) |
| CEO_Chairman_Duality | -3.044*** | -3.254*** | -3.332*** | -3.355*** | -2.615*** | -3.186*** |
|  | (0.716) | (1.010) | (0.713) | (1.007) | (0.718) | (1.014) |
| PtB_per_Share | 0.0742 | 0.0927 | 0.0930 | 0.0850 | 0.0544 | 0.0697 |
|  | (0.0799) | (0.126) | (0.0806) | (0.125) | (0.0804) | (0.126) |
| Constant | 49.11*** | 53.05*** | 49.92*** | 52.52*** | 48.70*** | 51.99*** |
|  | (5.228) | (7.205) | (5.119) | (7.195) | (5.108) | (7.089) |
| Year Fixed Effects | Yes | Yes | Yes | Yes | Yes | Yes |
| Industry Fixed Effects | Yes | Yes | Yes | Yes | Yes | Yes |
| Observations | 930 | 467 | 930 | 467 | 930 | 467 |
| R-squared | 0.210 | 0.185 | 0.197 | 0.181 | 0.224 | 0.201 |
